# Supplementary material for: Micro/Mesoporous Fe3O4/Fe-Phthalocyanine Microspheres and Effects of Their Surface Morphology on the Crystallization and Properties of Poly(Arylene Ether Nitrile) Composites
Source: MDPI journal article supplement (doi:10.3390/ma11081356), 2018-08-05
Supplement: s1 [file s1]

## Supporting Information

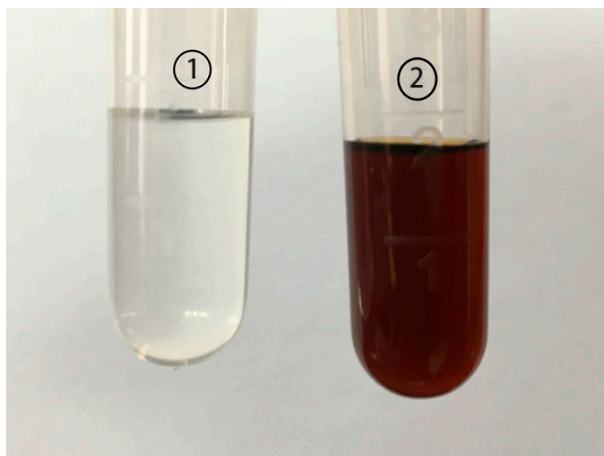

**Figure S1.** Digital photo of NMP solution (1) before etching and (2) after etching.

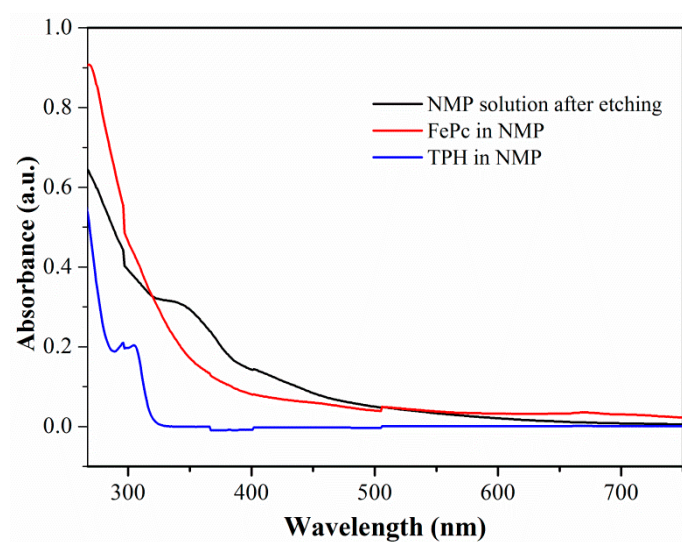

**Figure S2.** The UV-vis spectra NMP solution after etching and the controlled sample of TPH and FePc in the NMP solution.

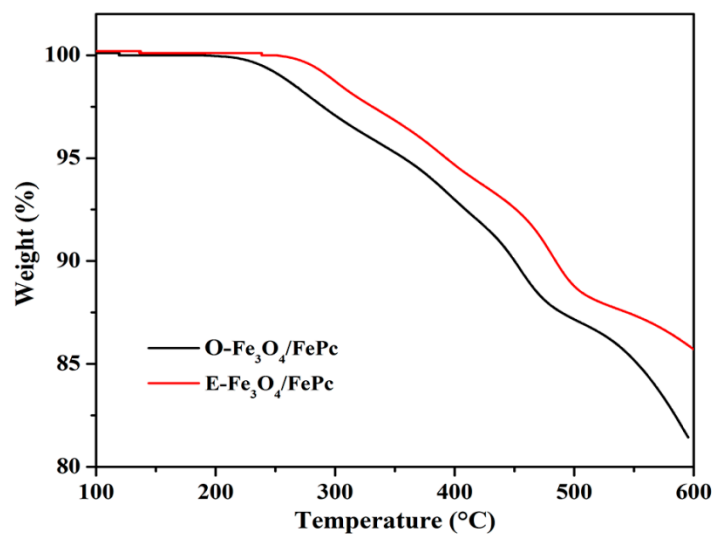

**Figure S3.** TGA curves of the Fe<sub>3</sub>O<sub>4</sub>/FePc hybrid microspheres before and after etching.
